# Supplementary material for: Relevance of Host Cell Surface Glycan Structure for Cell Specificity of Influenza A Viruses
Source: MDPI journal article supplement (doi:10.3390/v15071507), 2023-07-05
Supplement: s1 [file s1]

## Supporting Information

### Relevance of host cell surface glycan structure for cell specificity of influenza A viruses

Markus Kastner <sup>1,11,\*</sup>, Andreas Karner <sup>1,11,\*</sup>, Rong Zhu <sup>1,\*</sup>, Qiang Huang <sup>2</sup>, Andreas Geissner <sup>3,4,11</sup>, Anne Sadewasser <sup>5,11</sup>, Markus Lesch <sup>6</sup>, Xenia Wörmann<sup>6</sup>, Alexander Karlas<sup>6,11</sup>, Peter H. Seeberger <sup>3,4</sup>, Thorsten Wolff <sup>5</sup>, Peter Hinterdorfer <sup>1</sup>, Andreas Herrmann<sup>7</sup> and Christian Sieben <sup>8,9,§</sup>

<sup>1</sup> *Institute for Biophysics, Johannes Kepler University Linz, 4020 Linz, Austria*

<sup>2</sup> *State Key Laboratory of Genetic Engineering, Shanghai Engineering Research Center of Industrial Microorganisms, MOE Engineering Research Center of Gene Technology, School of Life Sciences, Fudan University, Shanghai 200438, China*

<sup>3</sup> *Department for Biomolecular Systems, Max Planck Institute for Colloids and Interfaces, 14476 Potsdam, Germany*

<sup>4</sup> *Institute of Chemistry and Biochemistry, Freie Universität Berlin, 14195 Berlin Germany*

<sup>5</sup> *Div. of Influenza and other Respiratory Viruses, Robert Koch-Institute, 13353 Berlin, Germany*

<sup>6</sup> *Molecular Biology Department, Max Planck Institute for Infection Biology, 10117 Berlin, Germany*

<sup>7</sup> *Institut für Chemie und Biochemie, Freie Universität Berlin, Altensteinstraße 23a, 14195 Berlin Germany*

<sup>8</sup> *Nanoscale Infection Biology Group, Department of Cell Biology, Helmholtz Centre for Infection Research, 38124 Braunschweig, Germany,*

<sup>9</sup> *Institute for Genetics, Technische Universität Braunschweig, 38106 Braunschweig, Germany*

<sup>11</sup> *Current address: M.K.: Materials Characterization Lab (MCL), Materials Research Institute (MRI), Pennsylvania State University, University Park, PA 16802, USA; A.K.: University of Applied Sciences Upper Austria, School of Medical Engineering and Applied Social Sciences, Garnisonstr. 21, 4020 Linz, Austria; A.G.: Department of Chemistry, University of British Columbia, 2036 Main Mall, Vancouver BC, Canada V6T 1Z1; A.S.: Secarna Pharmaceuticals GmbH & Co. KG, Am Klopferspitz 19, 82152 Planegg/Martinsried, Germany; A.K.: Viral Vectors and Gene Therapeutics, ProBioGen AG, 13086 Berlin, Germany*

\* These authors contributed equally to this work

§ Corresponding author: christian.sieben@helmholtz-hzi.de (C.S.)

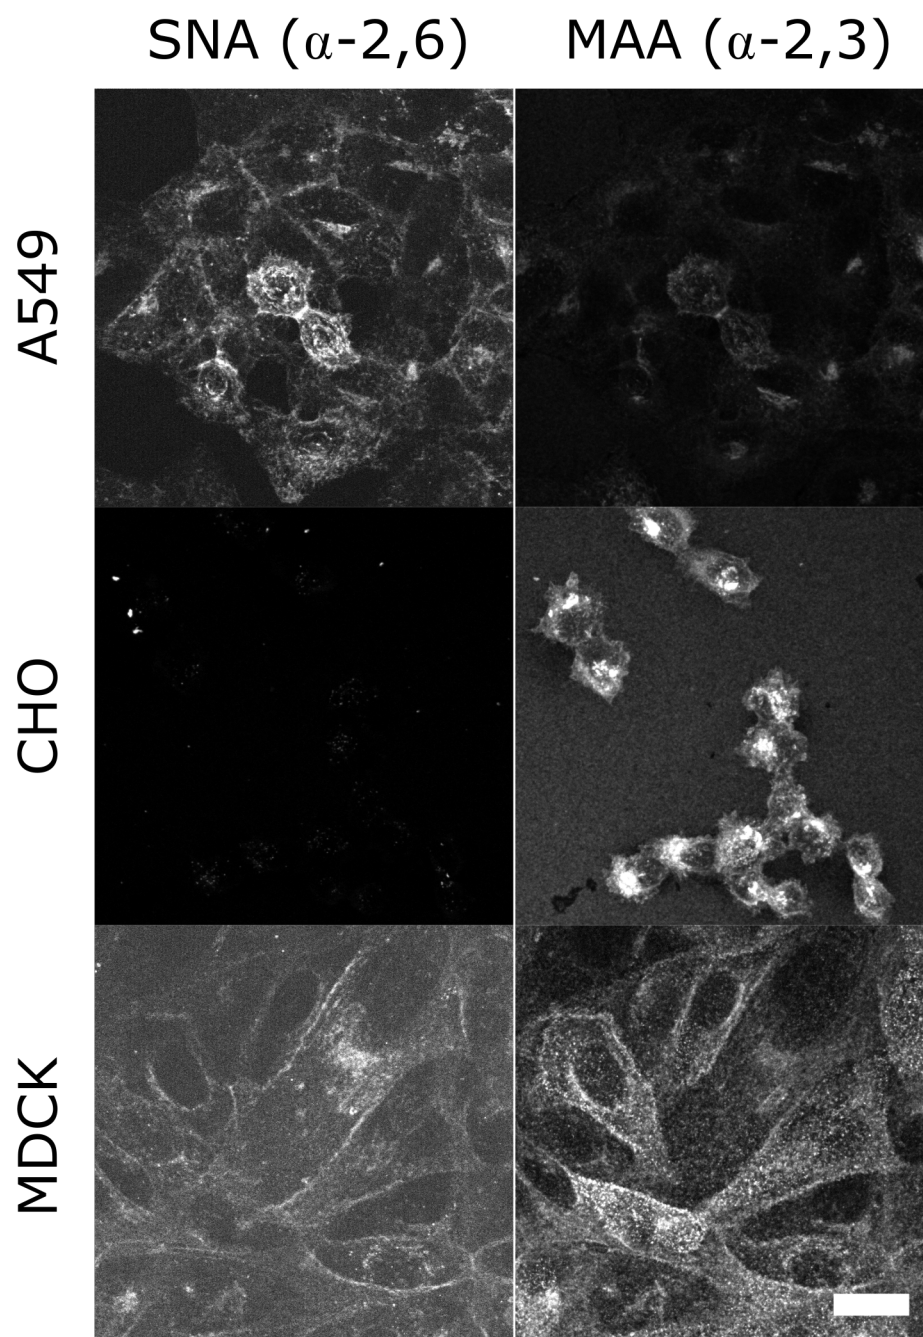

**Supplementary Figure S1. Surface sialic acid characterization by fluorescence confocal microscopy.** MDCK, CHO, and A549 cells were washed with PBS and fixed with PFA for 20 min at room temperature. The cells were incubated with SNA-FITC (10  $\mu$ g/ml) and MAA-Alexa647 (50  $\mu$ g/ml) for 20 min, washed with PBS and imaged by confocal microscopy.

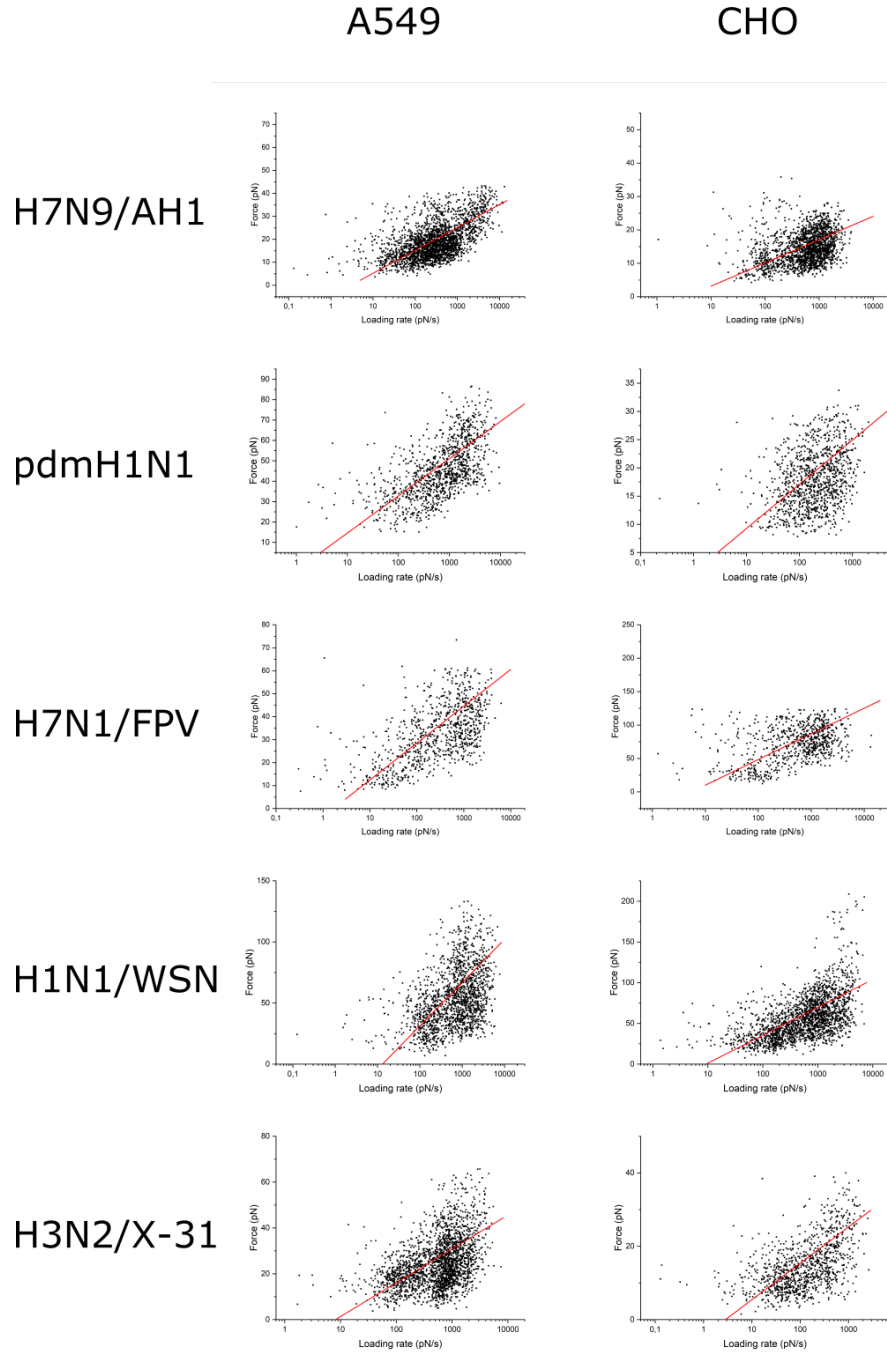

**Supplementary Figure S2. Overview showing force vs. loading rate scatter plots for all virus-cell combinations.** Scatter plots showing unbinding force  $F$  plotted against the loading rate  $r$  of every individual force curve. From those data, the values for  $k_{off}$  and  $x_u$  were determined (Table 2). For each virus-cell combination, we measured between 12-15 cells.

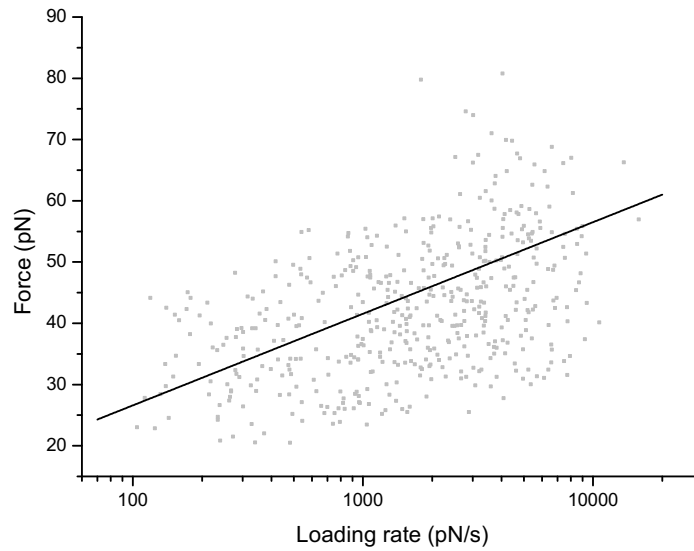

**Supplementary Figure S3. SVFS dynamic force spectra of H7N9 AH1 interacting with single receptors on living MDCK cells.** Scatter plot showing unbinding force  $F$  plotted against the loading rate  $r$  of every individual force curve. From those data, the values for  $k_{off}$  and  $x_u$  were determined to be  $0.256 \pm 0.00169 \text{ s}^{-1}$  and  $6.160 \pm 0.0146 \text{ \AA}$  (mean  $\pm$  SD), respectively. We measured between 12-15 cells.

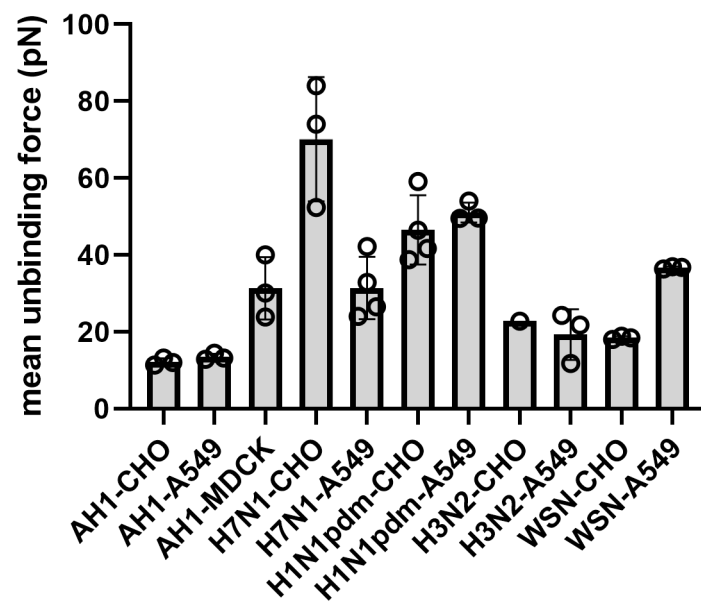

**Supplementary Figure S4. Comparison of the mean unbinding force at pulling velocity 4  $\mu\text{m}/\text{sec}$ .** Each point represents one cell of the shown virus-cell interaction pair. Shown are mean  $\pm$  SD,  $n=3$ .

**Supplementary Table S1. Comparison of SVFS results obtained by using two different fitting approaches.** Loading rates  $LR$  can either be obtained by using the mean effective spring constant  $\langle k_{eff} \rangle$  for each pulling velocity  $v$  ( $LR = v \cdot k_{eff}$ ) or, using a more adapted approach reported previously and now used in this study, calculated for each individual force-distance curve. Each fitting approach results in slightly different fitting parameters. Dissociation rate  $k_{off}$ , separation from the energy barrier  $x_u$ , and average bond lifetime  $\tau_{off}$  obtained by fitting the SVFS data to a single energy barrier binding model.

**New Analysis, MLE from force vs. loading rate scatter plots (mean  $\pm$  SD)**

| Virus    | Cell | k_off (1/s) | x_beta (A) |      | tau (s) |        |        |
|----------|------|-------------|------------|------|---------|--------|--------|
| H1N1_WSN | A549 | 0.851       | 0.0525     | 2.67 | 0.0445  | 1.1751 | 0.0725 |
| H1N1_WSN | CHO  | 0.62        | 0.0355     | 2.77 | 0.0397  | 1.6129 | 0.0924 |
| H3N2_X31 | A549 | 1.27        | 0.0704     | 6.42 | 0.0897  | 0.7874 | 0.0436 |
| H3N2_X31 | CHO  | 0.66        | 0.0472     | 9.54 | 0.183   | 1.5152 | 0.1084 |
| H3N2_X31 | MDCK | 1.61        | 0.141      | 9.11 | 0.198   | 0.6211 | 0.0544 |

**Old Analysis, fit with grouped loading rates, (mean  $\pm$  SD)**

| Virus    | Cell | k_off (1/s) | x_beta (A) |      | tau (s) |        |        |
|----------|------|-------------|------------|------|---------|--------|--------|
| H1N1_WSN | A549 | 1.22        | 0.32       | 1.8  | 0.3     | 0.8197 | 0.2150 |
| H1N1_WSN | CHO  | 1.16        | 0.13       | 2.4  | 0.3     | 0.8621 | 0.0966 |
| H3N2_X31 | A549 | 0.64        | 0.52       | 4.2  | 4.1     | 1.5625 | 1.2695 |
| H3N2_X31 | CHO  | 0.18        | 0.17       | 26.1 | 31.1    | 5.5556 | 5.2469 |
| H3N2_X31 | MDCK | 0.45        | 0.35       | 8.4  | 7.9     | 2.2222 | 1.7284 |
